# Supplementary material for: Capsular polysaccharide correlates with immune response to the human gut microbe Ruminococcus gnavus
Source: PubMed Central journal article supplement — Proc Natl Acad Sci U S A. 2021 May 10;118(20):e2007595118. doi: 10.1073/pnas.2007595118 (PMC8157926; doi:10.1073/pnas.2007595118), 2021-05-10
Supplement: pnas.2007595118.sapp.pdf [file pnas.2007595118.sapp.pdf]

**Supplemental Information for** Capsular polysaccharide correlates with immune response to the human gut microbe, *Ruminococcus gnavus*

Matthew T. Henke,<sup>1</sup> Eric M. Brown,<sup>2</sup> Chelsi D. Cassilly,<sup>1</sup> Hera Vlamakis,<sup>2</sup> Ramnik J. Xavier,<sup>2</sup> and Jon Clardy<sup>1,\*</sup>

<sup>1</sup>Harvard Medical School, Boston, MA 02115 <sup>2</sup>Massachusetts General Hospital, Boston, MA; and Broad Institute of Harvard and MIT, Cambridge, MA

\*corresponding author: jon\_clardy@hms.harvard.edu

**Table S1.** Strains used in this study.

| Strain     | Origin                                |
|------------|---------------------------------------|
| ATCC 29149 | stool; healthy adult                  |
| ATCC 35913 | stool; healthy adult                  |
| RJX1119    | stool; child treated with antibiotics |
| RJX1120    | biopsy, adult with IBD                |
| RJX1121    | biopsy, adult with IBD                |
| RJX1122    | biopsy, adult with IBD                |
| RJX1123    | biopsy, adult with IBD                |
| RJX1124    | biopsy, adult with IBD                |
| RJX1125    | biopsy, adult with IBD                |
| RJX1126    | biopsy, adult with IBD                |
| RJX1127    | biopsy, adult with IBD                |
| RJX1128    | stool; adult with IBD                 |

ATCC 29149 and ATCC 35913 came from the feces of healthy adults and were purchased from ATCC. RJX1119 was isolated from an infant treated with antibiotics (24), RJX1120 through RJX1127 were isolated from biopsies from IBD patients, strain RJX1128 was isolated from feces of an IBD patient (10). Strains were grown in anaerobically at 37°C in defined medium (34).

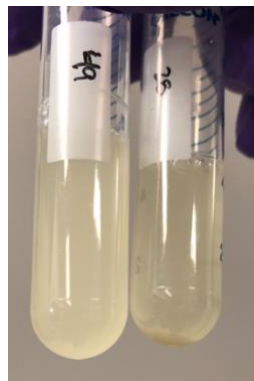

**Figure S1.** Differences in settling phenotype between some strains of *Ruminococcus gnavus*. ATCC 29149 (“49”) does not settle in culture, while RJX1128 (“28”) settles readily.

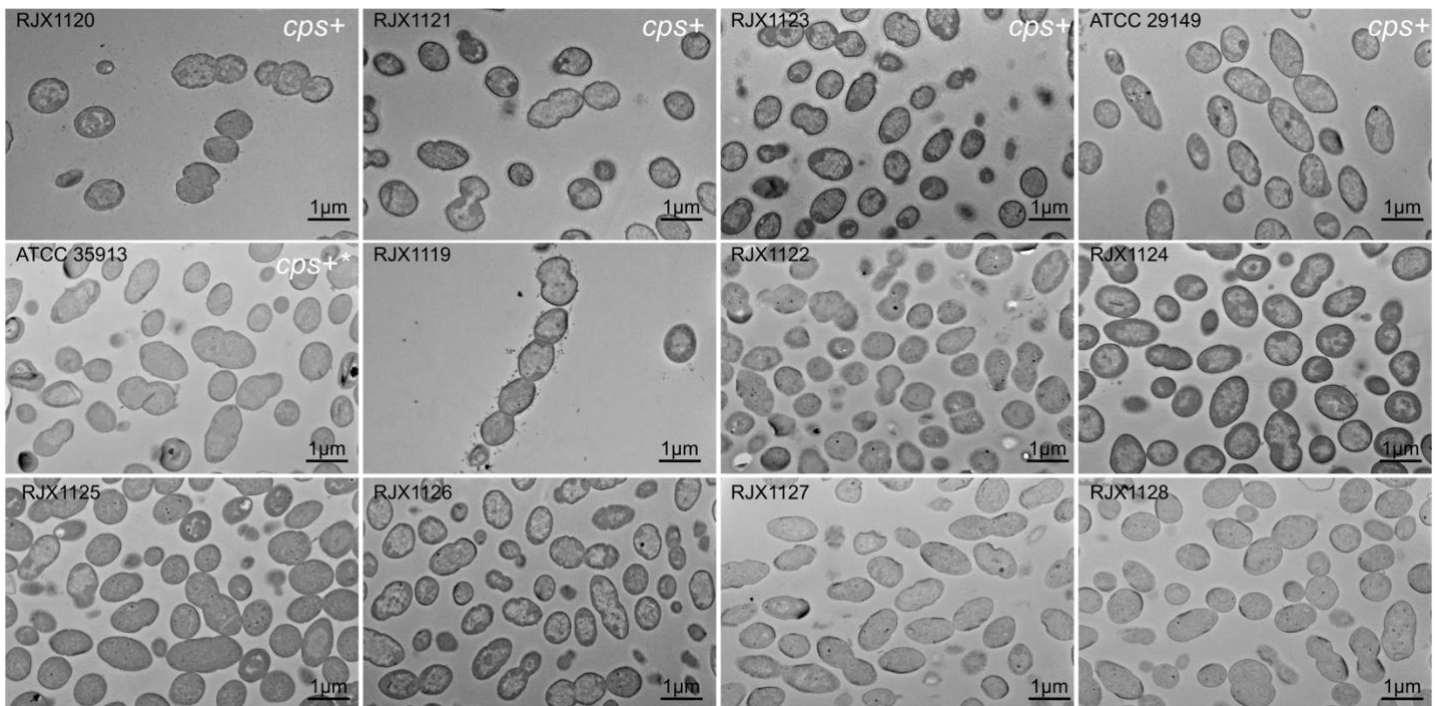

**Figure S2.** Electron micrographs of the 12 *R. gnavus* strains included in this study after 24 hours of growth. Some strains possess a capsule polysaccharide gene cluster (*cps*<sup>+</sup>) and show increased capsular material on their cell surfaces, except for ATCC 35913, which has several nonsense mutations in the *cps* gene cluster. While other strains lack the *cps* gene cluster, and have lesser or nonexistent capsules. Uniquely, strain RJX1119 lacks the *cps* gene cluster, but forms chains and appears to be encapsulated.

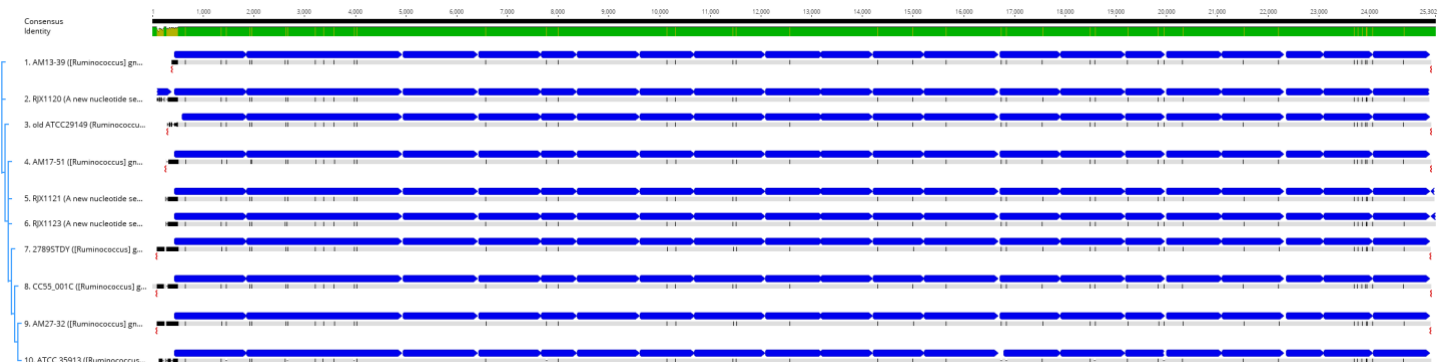

**Figure S3.** The capsule gene cluster (RUMGNA\_02411 to RUMGNA\_02392) is only found in some strains, and is conserved at >99% sequence identity. This indicates it was likely recently shared among these strains. Note that several genes in the ATCC 35913 *cps* cluster are disrupted by nonsense mutations, likely rendering this cluster nonfunctional.

**Table S2.** Gene annotations for the capsular polysaccharide biosynthetic gene cluster (*cps*) found in several strains of *Ruminococcus gnavus*, shown in Figure 1C.

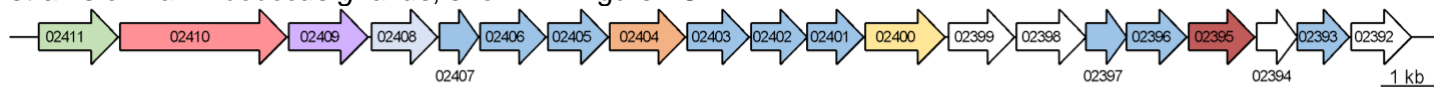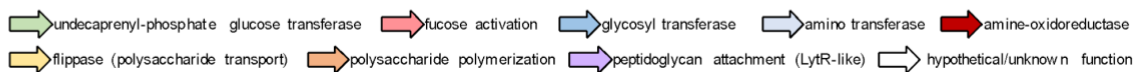

| ATCC 29149<br>(AAYG) locus | Consensus description                                    | Gene size<br>(bp) | Protein Size<br>(aa) |
|----------------------------|----------------------------------------------------------|-------------------|----------------------|
| RUMGNA_02411               | polyprenyl glycosylphosphotransferase                    | 1,272             | 424                  |
| RUMGNA_02410               | bifunctional fucokinase/L-fucose-1-P-guanylyltransferase | 3,060             | 1,020                |
| RUMGNA_02409               | LytR family transcriptional regulator                    | 1,464             | 488                  |
| RUMGNA_02408               | DegT/DnrJ/EryC1/StrS aminotransferase family protein     | 1,230             | 410                  |
| RUMGNA_02407               | glycosyl transferase                                     | 696               | 232                  |
| RUMGNA_02406               | glycosyltransferase family 1 or 4 protein                | 1,233             | 411                  |
| RUMGNA_02405               | glycosyltransferase family 2 protein                     | 1,068             | 356                  |
| RUMGNA_02404               | O-antigen ligase/polymerase family protein               | 1,386             | 462                  |
| RUMGNA_02403               | glycosyltransferase family 1 protein                     | 1,119             | 373                  |
| RUMGNA_02402               | glycosyltransferase family 2 protein                     | 1,011             | 337                  |
| RUMGNA_02401               | glycosyltransferase family 2 protein                     | 1,008             | 336                  |
| RUMGNA_02400               | flippase                                                 | 1,455             | 485                  |
| RUMGNA_02399               | hypothetical protein                                     | 1,203             | 401                  |
| RUMGNA_02398               | hypothetical protein                                     | 1,263             | 421                  |
| RUMGNA_02397               | WecB/TagA/CpsF family glycosyltransferase                | 771               | 257                  |
| RUMGNA_02396               | glycosyltransferase family 1 protein                     | 1,098             | 366                  |
| RUMGNA_02395               | NAD(P)-binding/amine oxido reductase protein             | 1,218             | 406                  |
| RUMGNA_02394               | hypothetical protein                                     | 753               | 251                  |
| RUMGNA_02393               | glycosyltransferase, group 2 family protein              | 954               | 318                  |
| RUMGNA_02392               | DUF3048 domain-containing protein                        | 1,104             | 368                  |

**Table S3.** Locus name comparison of capsular polysaccharide biosynthesis gene cluster (*cps*) among the *Ruminococcus gnavus* strains. Genes that have non-sense mutations in ATCC 35913 genome are labeled in red.

| ATCC 29149 (AAYG) locus | Consensus description                                           | ATCC 29149 (PUEL0) | ATCC 29149 (CP0) | RJX1120      | RJX1121        | RJX1123        | ATCC 35913         | 2789STD Y      | AM13-39      | AM17-51        | AM27-32        | CC55_001C          | Lachnospiraceae bacterium 2_1_58FAA                                      |
|-------------------------|-----------------------------------------------------------------|--------------------|------------------|--------------|----------------|----------------|--------------------|----------------|--------------|----------------|----------------|--------------------|--------------------------------------------------------------------------|
| RUMGNA_02411            | polyprenyl glycosylphospho transferase                          | C5Y99_R S00105     | FXV78_R S12430   | CDL27_ 10975 | CDL19_R S08915 | CDL25_R S01380 | RGNV35913_ RS12015 | ARA00_R S00965 | DW153_ 04070 | DW207_R S00740 | DW722_R S05785 | HMPREF1201_RS03490 | HMPREF0991_RS01530                                                       |
| RUMGNA_02410            | <i>bifunctional fucokinase/L-fucose-1-P-guanylyltransferase</i> | C5Y99_R S00110     | FXV78_R S12435   | CDL27_ 10980 | CDL19_R S08920 | CDL25_R S01375 | RGNV35913_ RS12010 | ARA00_R S00970 | DW153_ 04075 | DW207_R S00745 | DW722_R S05780 | HMPREF1201_RS03485 | HMPREF0991_RS01525                                                       |
| RUMGNA_02409            | LytR family transcriptional regulator DegT/DnrJ/EryC1/StrS      | C5Y99_R S00115     | FXV78_R S12440   | CDL27_ 10985 | CDL19_R S08925 | CDL25_R S01370 | RGNV35913_ RS12005 | ARA00_R S00975 | DW153_ 04080 | DW207_R S00750 | DW722_R S05775 | HMPREF1201_RS03480 | HMPREF0991_RS01520                                                       |
| RUMGNA_02408            | aminotransferase family protein                                 | C5Y99_R S00120     | FXV78_R S12445   | CDL27_ 10990 | CDL19_R S08930 | CDL25_R S01365 | RGNV35913_ RS12000 | ARA00_R S00980 | DW153_ 04085 | DW207_R S00755 | DW722_R S05770 | HMPREF1201_RS03475 | HMPREF0991_RS01515                                                       |
| RUMGNA_02407            | glycosyl transferase                                            | C5Y99_R S00125     | FXV78_R S12450   | CDL27_ 10995 | CDL19_R S08935 | CDL25_R S01360 | RGNV35913_ RS11995 | ARA00_R S00985 | DW153_ 04090 | DW207_R S00760 | DW722_R S05765 | HMPREF1201_RS03470 | HMPREF0991_RS01510                                                       |
| RUMGNA_02406            | glycosyltransferase family 1 or 4 protein                       | C5Y99_R S00130     | FXV78_R S12455   | CDL27_ 11000 | CDL19_R S08940 | CDL25_R S01355 | RGNV35913_ RS11990 | ARA00_R S00990 | DW153_ 04095 | DW207_R S00765 | DW722_R S05760 | HMPREF1201_RS03465 | HMPREF0991_RS01505                                                       |
| RUMGNA_02405            | glycosyltransferase family 2 protein                            | C5Y99_R S00135     | FXV78_R S12460   | CDL27_ 11005 | CDL19_R S08945 | CDL25_R S01350 | RGNV35913_ RS11985 | ARA00_R S00995 | DW153_ 04100 | DW207_R S00770 | DW722_R S05755 | HMPREF1201_RS03460 | HMPREF0991_RS01500                                                       |
| RUMGNA_02404            | O-antigen ligase/polymerase family protein                      | C5Y99_R S00140     | FXV78_R S12465   | CDL27_ 11010 | CDL19_R S08950 | CDL25_R S01345 | RGNV35913_ RS11980 | ARA00_R S01000 | DW153_ 04105 | DW207_R S00775 | DW722_R S05750 | HMPREF1201_RS03455 | HMPREF0991_RS01495                                                       |
| RUMGNA_02403            | glycosyltransferase family 1 protein                            | C5Y99_R S00145     | FXV78_R S12470   | CDL27_ 11015 | CDL19_R S08955 | CDL25_R S01340 | RGNV35913_ RS11975 | ARA00_R S01005 | DW153_ 04110 | DW207_R S00780 | DW722_R S05745 | HMPREF1201_RS03450 | HMPREF0991_RS01490                                                       |
| RUMGNA_02402            | glycosyltransferase family 2 protein                            | C5Y99_R S00150     | FXV78_R S12475   | CDL27_ 11020 | CDL19_R S08960 | CDL25_R S01335 | RGNV35913_ RS11970 | ARA00_R S01010 | DW153_ 04115 | DW207_R S00785 | DW722_R S05740 | HMPREF1201_RS03445 | HMPREF0991_RS01485                                                       |
| RUMGNA_02401            | glycosyltransferase family 2 protein                            | C5Y99_R S00155     | FXV78_R S12480   | CDL27_ 11025 | CDL19_R S08965 | CDL25_R S01330 | RGNV35913_ RS11965 | ARA00_R S01015 | DW153_ 04120 | DW207_R S00790 | DW722_R S05735 | HMPREF1201_RS03440 | HMPREF0991_RS01480                                                       |
| RUMGNA_02400            | flippase                                                        | C5Y99_R S00160     | FXV78_R S12485   | CDL27_ 11030 | CDL19_R S08970 | CDL25_R S01325 | RGNV35913_ RS11960 | ARA00_R S01020 | DW153_ 04125 | DW207_R S00795 | DW722_R S05730 | HMPREF1201_RS03435 | HMPREF0991_RS01475;<br>HMPREF0991_RS01470;<br>HMPREF0991_RS01465;<br>and |
| RUMGNA_02399            | hypothetical protein                                            | C5Y99_R S00165     | FXV78_R S12490   | CDL27_ 11035 | CDL19_R S08975 | CDL25_R S01320 | RGNV35913_ RS11955 | ARA00_R S01025 | DW153_ 04130 | DW207_R S00800 | DW722_R S05725 | HMPREF1201_RS03430 | HMPREF0991_RS01460                                                       |
| RUMGNA_02398            | hypothetical protein                                            | C5Y99_R S00170     | FXV78_R S12495   | CDL27_ 11040 | CDL19_R S08980 | CDL25_R S01315 | RGNV35913_ RS11950 | ARA00_R S01030 | DW153_ 04135 | DW207_R S00805 | DW722_R S05720 | HMPREF1201_RS03425 | HMPREF0991_RS01455                                                       |

|                  | WecB/TagA/Cps<br>F family                   |                   |                   |                 |                   |                   |                       |                   |                 |                   |                   |                        |                        |
|------------------|---------------------------------------------|-------------------|-------------------|-----------------|-------------------|-------------------|-----------------------|-------------------|-----------------|-------------------|-------------------|------------------------|------------------------|
| RUMGNA<br>_02397 | glycosyltransferase                         | C5Y99_R<br>S00175 | FXV78_R<br>S12500 | CDL27_<br>11045 | CDL19_R<br>S08985 | CDL25_R<br>S01310 | RGNV35913_<br>RS11945 | ARA00_R<br>S01035 | DW153_<br>04140 | DW207_R<br>S00810 | DW722_R<br>S05715 | HMPREF1201<br>_RS03420 | HMPREF0991<br>_RS01450 |
| RUMGNA<br>_02396 | glycosyltransferase family 1 protein        | C5Y99_R<br>S00180 | FXV78_R<br>S12505 | CDL27_<br>11050 | CDL19_R<br>S08990 | CDL25_R<br>S01305 | RGNV35913_<br>RS11940 | ARA00_R<br>S01040 | DW153_<br>04145 | DW207_R<br>S00815 | DW722_R<br>S05710 | HMPREF1201<br>_RS03415 | HMPREF0991<br>_RS01445 |
| RUMGNA<br>_02395 | NAD(P)-binding/amine oxidoreductase protein | C5Y99_R<br>S00185 | FXV78_R<br>S12510 | CDL27_<br>11055 | CDL19_R<br>S08995 | CDL25_R<br>S01300 | RGNV35913_<br>RS11935 | ARA00_R<br>S01045 | DW153_<br>04150 | DW207_R<br>S00820 | DW722_R<br>S05705 | HMPREF1201<br>_RS03410 | HMPREF0991<br>_RS01440 |
| RUMGNA<br>_02394 | hypothetical protein                        | C5Y99_R<br>S00190 | FXV78_R<br>S12515 | CDL27_<br>11060 | CDL19_R<br>S09000 | CDL25_R<br>S01295 | RGNV35913_<br>RS11930 | ARA00_R<br>S01050 | DW153_<br>04155 | DW207_R<br>S00825 | DW722_R<br>S05700 | HMPREF1201<br>_RS03405 | HMPREF0991<br>_RS01435 |
| RUMGNA<br>_02393 | glycosyltransferase, group 2 family protein | C5Y99_R<br>S00195 | FXV78_R<br>S12520 | CDL27_<br>11065 | CDL19_R<br>S09005 | CDL25_R<br>S01290 | RGNV35913_<br>RS11925 | ARA00_R<br>S01055 | DW153_<br>04160 | DW207_R<br>S00830 | DW722_R<br>S05695 | HMPREF1201<br>_RS03400 | HMPREF0991<br>_RS01430 |
| RUMGNA<br>_02392 | DUF3048 domain-containing protein           | C5Y99_R<br>S00200 | FXV78_R<br>S12525 | CDL27_<br>11070 | CDL19_R<br>S09010 | CDL25_R<br>S01285 | RGNV35913_<br>RS11920 | ARA00_R<br>S01060 | DW153_<br>04165 | DW207_R<br>S00835 | DW722_R<br>S05690 | HMPREF1201<br>_RS03395 | HMPREF0991<br>_RS01425 |

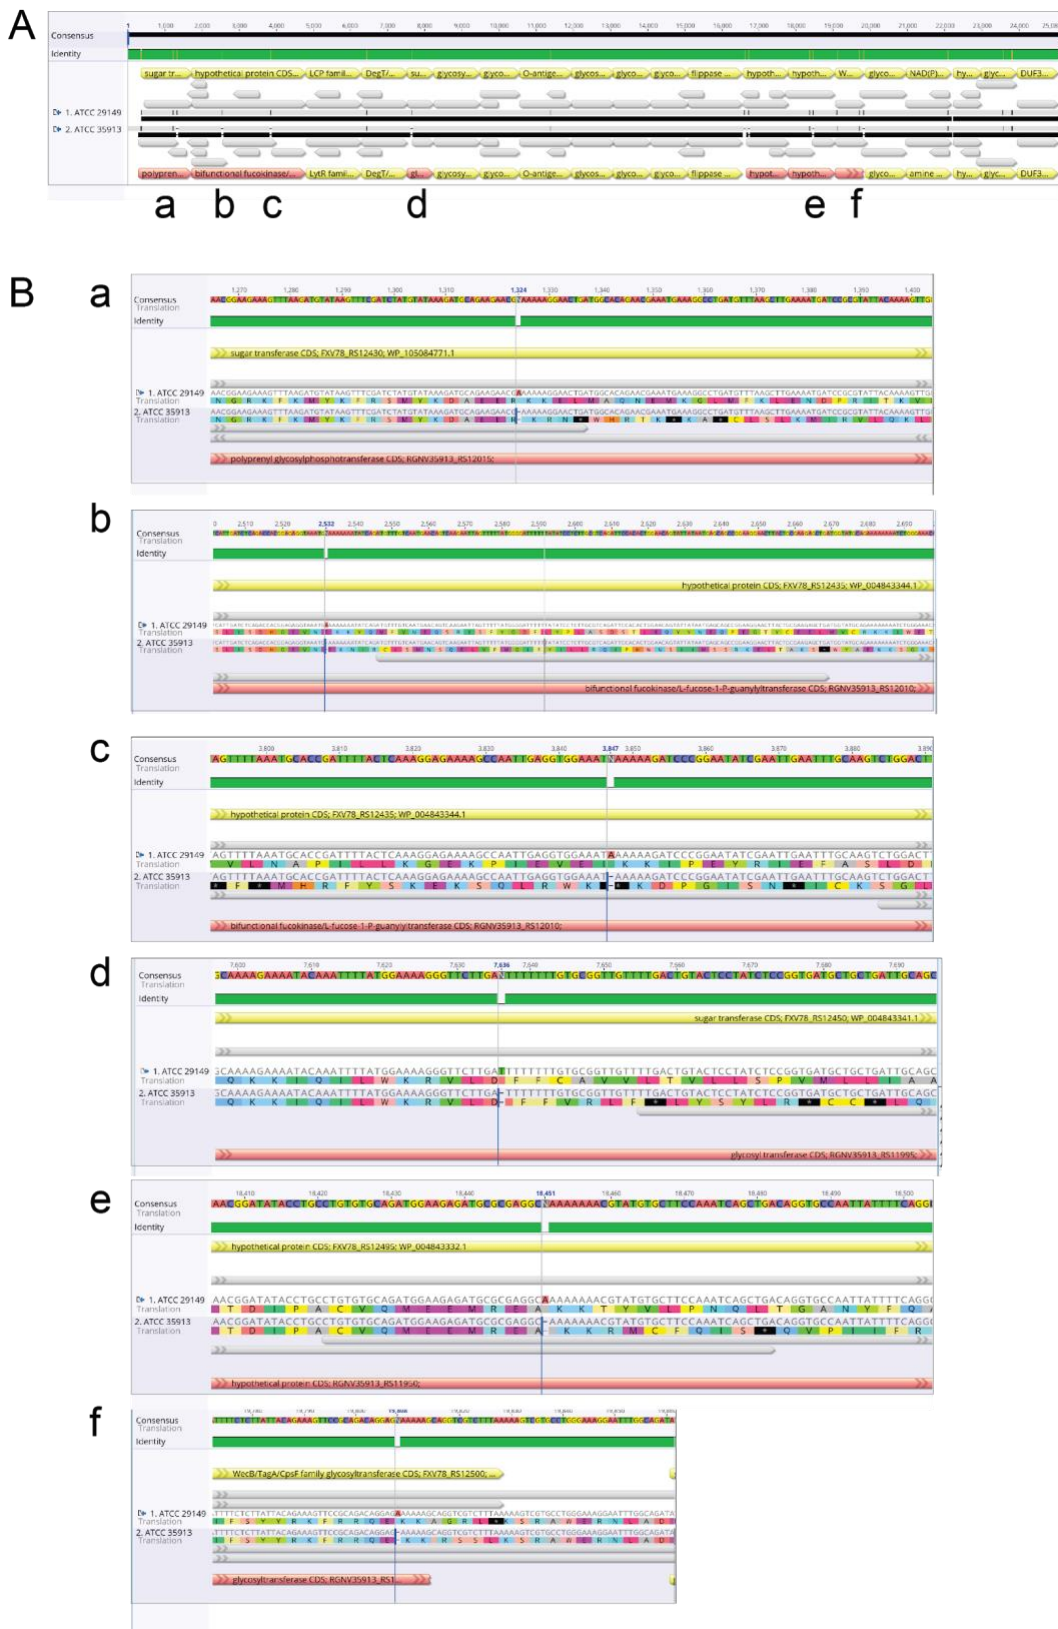

**Figure S4.** ATCC 35913 harbors a nonfunctional *cps* gene cluster. (A) The entire *cps* gene cluster compared between ATCC 29149 (top) and ATCC 35913 (bottom) where several genes (B) have nonsense mutations likely rendering these genes nonfunctional. Small letters indicate corresponding genes between A and B.



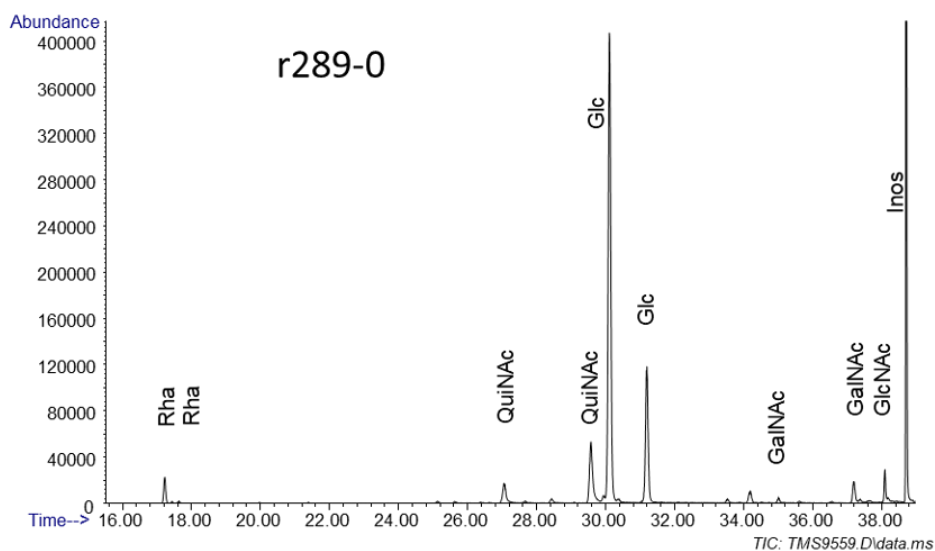

**Figure S5.** GCMS chromatogram of TMS-derivatives from hydrolysis of purified capsular polysaccharide shows it to be composed of glucose, N-acetyl-quinovosamine, N-acetyl-galactosamine. Trace amount of N-acetyl-glucosamine and rhamnose are also detected.

**Table S4.** Quantification of area under peaks from GCMS chromatogram above for each of the major glycosyl residue detected, along with their structures.

| Structure                                                                           | Glycosyl residue                | Mass (mg) | Mol % <sup>1</sup> | Ratio |
|-------------------------------------------------------------------------------------|---------------------------------|-----------|--------------------|-------|
|                                                                                     | Rhamnose (Rha)                  | 1.3       | 2.2                |       |
| 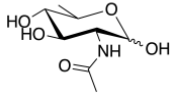 | N-Acetyl Quinovosamine (QuiNAc) | 15.8      | 23.6               | 2     |
|  | Glucose (Glc)                   | 39.8      | 59.4               | 6     |
|  | N-Acetyl Galactosamine (GalNAc) | 9.0       | 11.0               | 1     |
|                                                                                     | N-Acetyl Glucosamine (GlcNAc)   | 3.1       | 3.8                |       |
|                                                                                     | SUM                             | 69.0      | 100.0              |       |

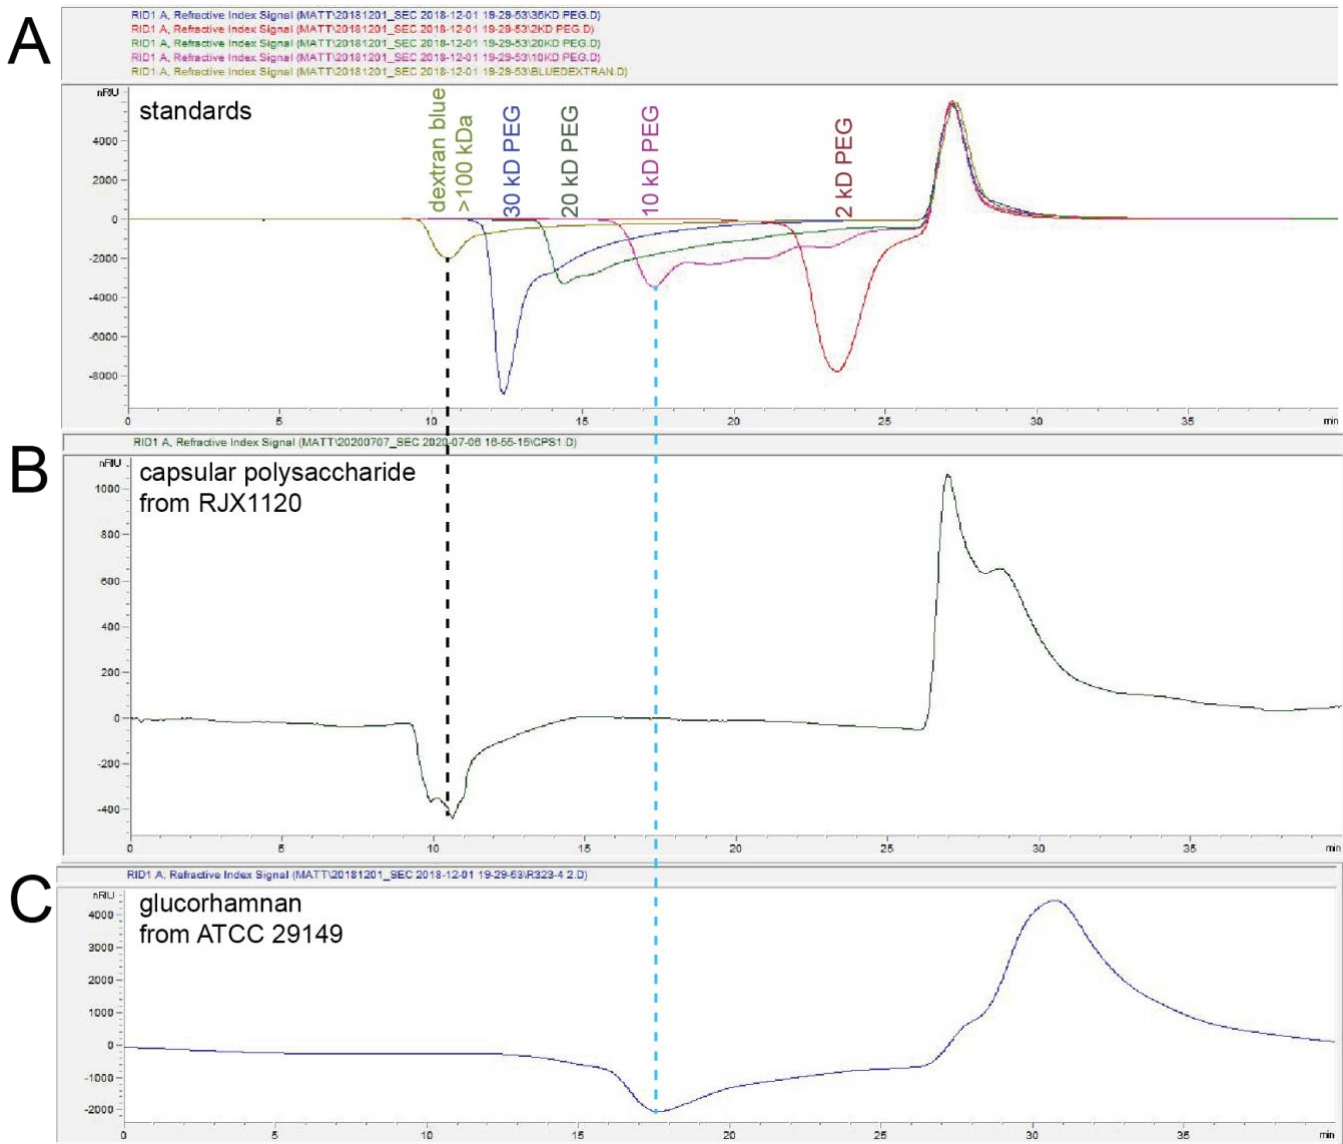

**Figure S6.** Analytical size exclusion chromatography of (A) molecular weight size standards, (B) purified capsular polysaccharide, and (C) purified glucorhamnan, indicates that the capsular polysaccharide is >100 kDa in size.



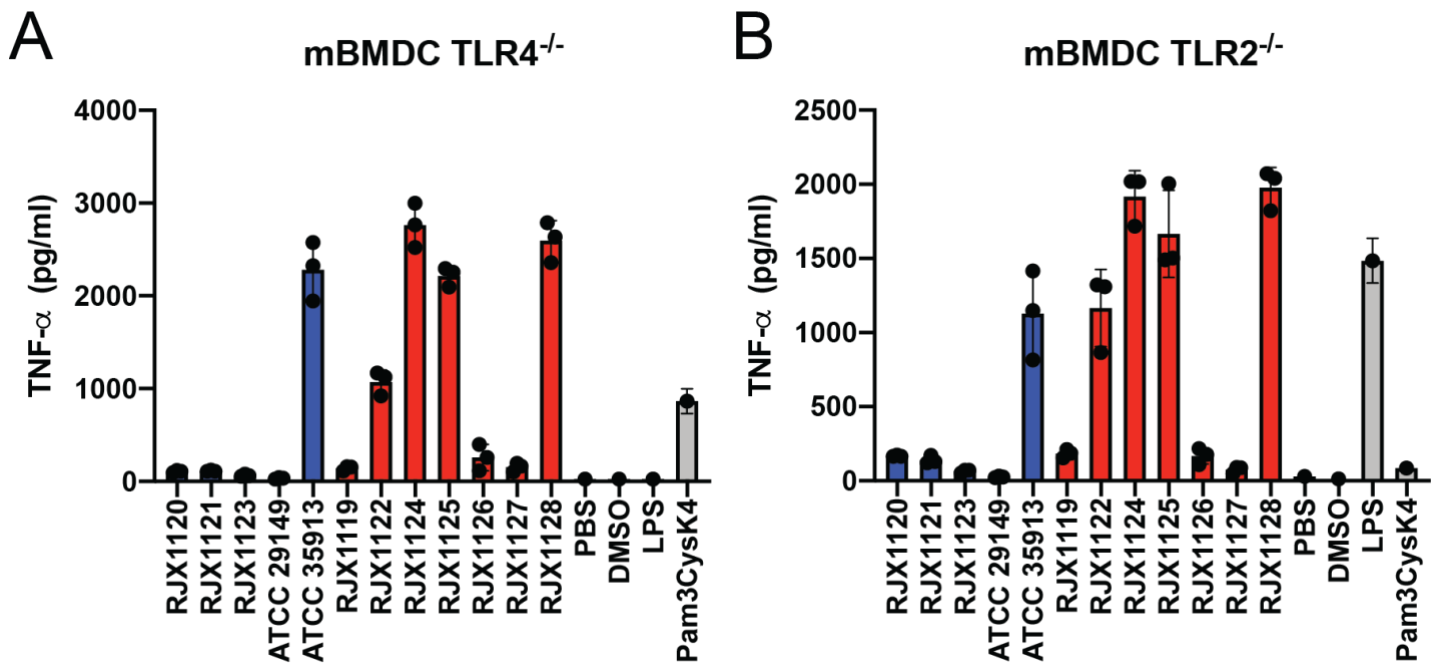

**Figure S7.** When mBMDCs lack either toll-like receptor (TLR) 4 (A) or TLR2 (B), they still secrete TNF $\alpha$  upon stimulation with unencapsulated strains of *R. gnavus*, while not responding robustly to strains that harbor a capsule. Strains harboring the *cps* locus are in blue, strains lacking are in red, controls in grey. ATCC35913 has a none functional *cps* cluster. LPS is a TLR4 agonist and Pam3CysK4 is a TLR2 agonist. *R. gnavus* strains were grown for 48 hrs, washed with PBS and then used to stimulate mBMDCs.

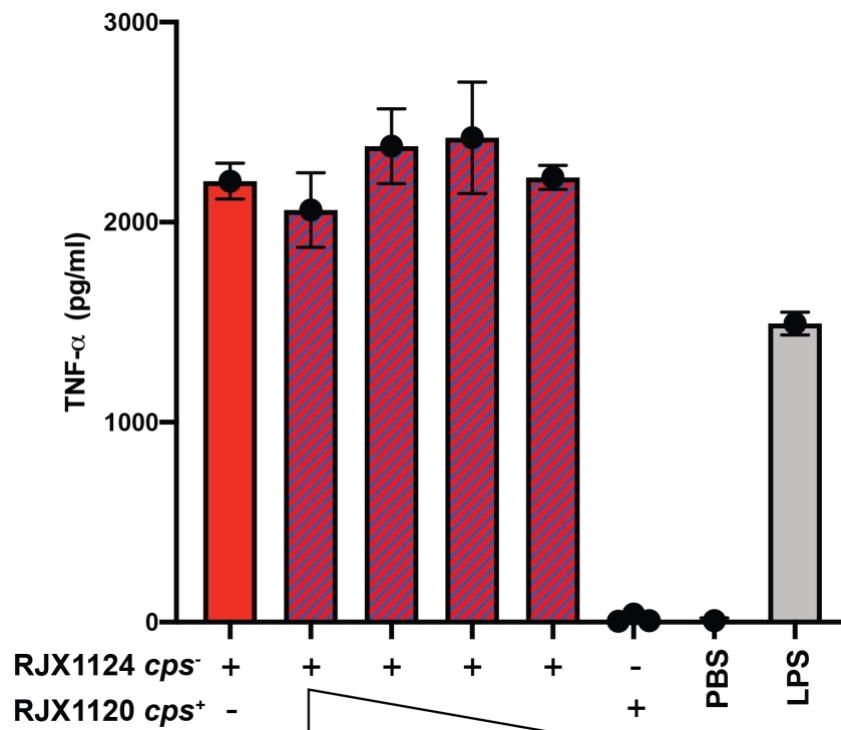

**Figure S8.** RJX1120 cells do not inhibit the ability of RJX1124 cells to stimulate mBMDCs to secrete TNF $\alpha$ , as detected by ELISA. *R. gnavus* cells grown for 48 hrs, washed with PBS, and then used to challenge mBMDCs.

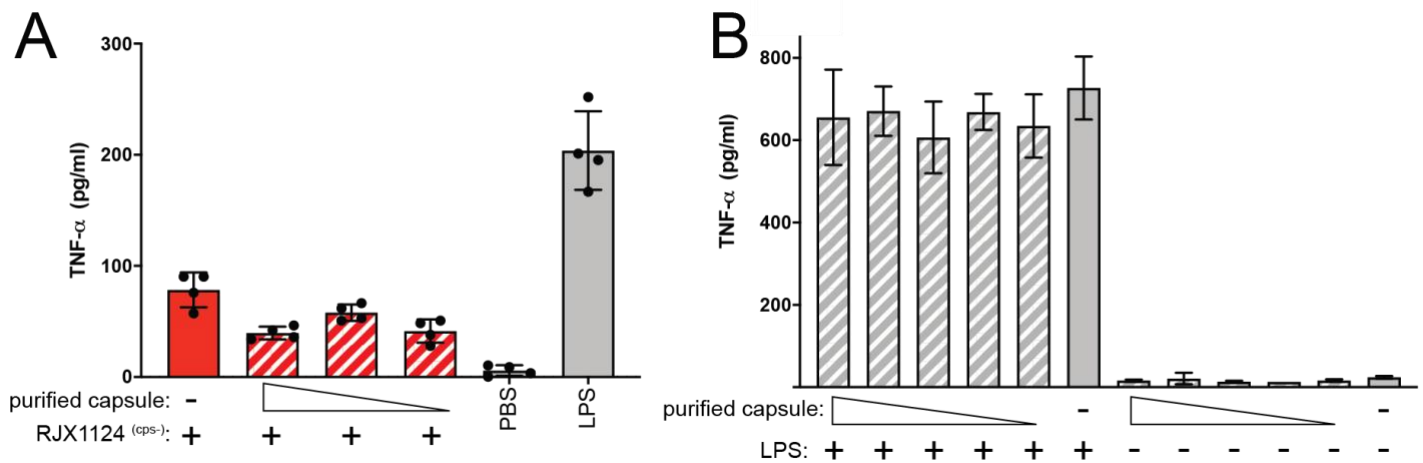

**Figure S9.** Purified capsular polysaccharide does not inhibit TNF $\alpha$  secretion when mBMDCs are stimulated with (A) an unencapsulated strain of *R. gnavus*, RJX1124, or (B) with LPS. The purified capsular polysaccharide also does not induce TNF $\alpha$  secretion. Dose of purified capsular polysaccharide are half-fold dilutions starting at 0.1 mg/mL, a typical concentration used for LPS or *R. gnavus* glucorhamnan in this assay.

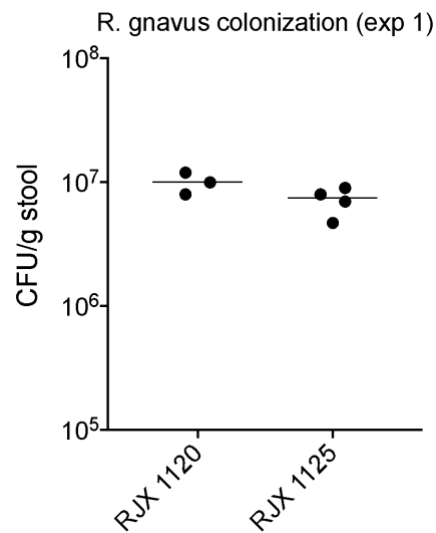

**Figure S10.** Both strains of *R. gnavus* colonized germ-free mice equally well as determined by cfus recovered from feces.
